# Supplementary material for: A study on the catalytic activity and theoretical modeling of a novel dual acidic mesoporous silica
Source: Royal Society of Chemistry journal article supplement (doi:10.1039/c3ra47638c), 2014-01-01
Supplement: c3ra47638c1.pdf [file c3ra47638c1.pdf]

# A study on catalytic activity and theoretical modeling of a novel dual acidic mesoporous silica

*Majid Vafaezadeh and Alireza Fattahi\**

Department of Chemistry, Sharif University of Technology, P.O. Box 11365-9516, Tehran, Iran.

Tel: +98 21 66005718; E-mail: [fattahi@sharif.edu](mailto:fattahi@sharif.edu)

**Fig 1S:** Optimized structures of O2-3, M2-3 and P2,3.

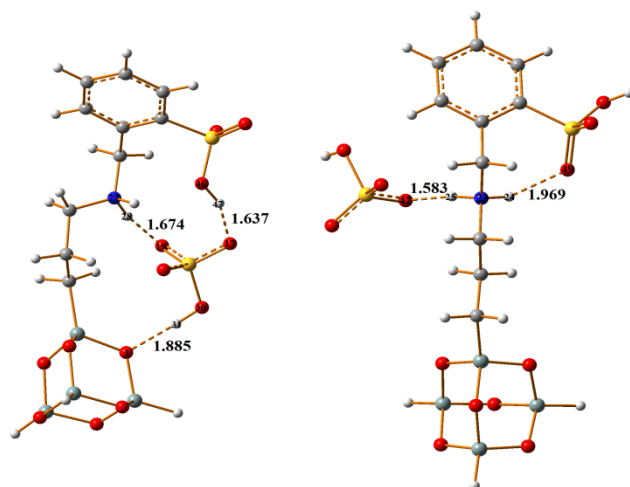

**O2**

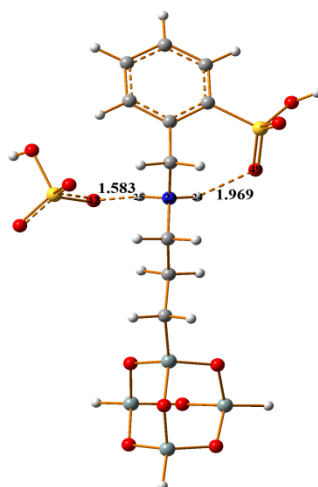

**O3**

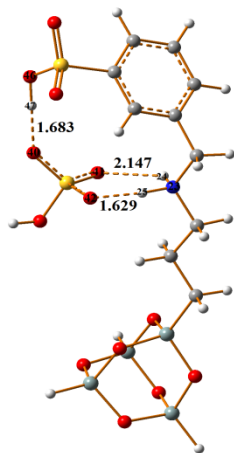

**M2**

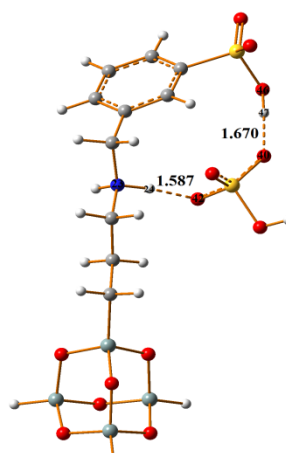

**M3**

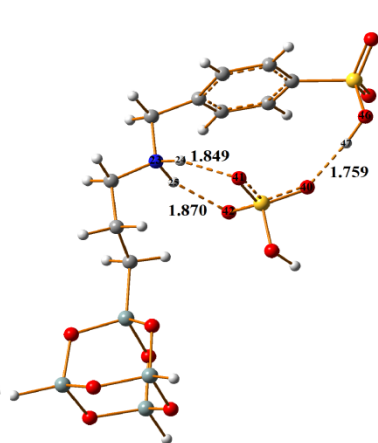

**P2**

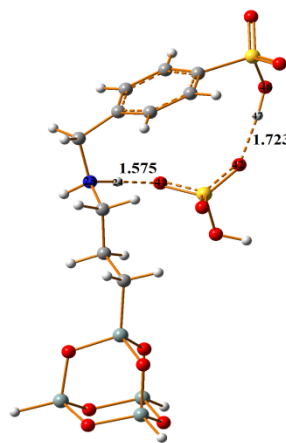

**P3**

Table 1: Total energy and significant H bonds length of **O2-3**, **M2-3** and **P2,3** (in Å)

| Structure | Total energy <sup>a</sup> | (H-bonds)                                              | r <sub>H...O</sub> <sup>b</sup> |
|-----------|---------------------------|--------------------------------------------------------|---------------------------------|
| <b>O2</b> | -3380.195640              | lp O <sub>17</sub> →σ*H <sub>47</sub> -O <sub>46</sub> | 1.637                           |
|           |                           | lp O <sub>19</sub> →σ*H <sub>28</sub> -N <sub>27</sub> | 1.674                           |
|           |                           | lp O <sub>3</sub> →σ*H <sub>31</sub> -O <sub>30</sub>  | 1.885                           |
| <b>O3</b> | -3380.188915              | lp O <sub>49</sub> →σ*H <sub>24</sub> -N <sub>23</sub> | 1.969                           |
|           |                           | lp O <sub>42</sub> →σ*H <sub>25</sub> -N <sub>23</sub> | 1.583                           |
| <b>M2</b> | -3380.198430              | lp O <sub>40</sub> →σ*H <sub>47</sub> -O <sub>46</sub> | 1.683                           |
|           |                           | lp O <sub>41</sub> →σ*H <sub>24</sub> -N <sub>23</sub> | 2.147                           |
|           |                           | lp O <sub>42</sub> →σ*H <sub>45</sub> -N <sub>23</sub> | 1.629                           |
| <b>M3</b> | -3380.196964              | lp O <sub>40</sub> →σ*H <sub>47</sub> -O <sub>46</sub> | 1.670                           |
|           |                           | lp O <sub>42</sub> →σ*H <sub>24</sub> -N <sub>23</sub> | 1.587                           |
| <b>P2</b> | -3380.192291              | lp O <sub>40</sub> →σ*H <sub>47</sub> -O <sub>46</sub> | 1.759                           |
|           |                           | lp O <sub>41</sub> →σ*H <sub>24</sub> -N <sub>23</sub> | 1.849                           |
|           |                           | lp O <sub>42</sub> →σ*H <sub>25</sub> -N <sub>23</sub> | 1.870                           |
| <b>P3</b> | -3380.186811              | lp O <sub>42</sub> →σ*H <sub>47</sub> -O <sub>46</sub> | 1.723                           |
|           |                           | lp O <sub>41</sub> →σ*H <sub>24</sub> -N <sub>23</sub> | 1.575                           |

<sup>a</sup> The total energies are reported in atomic unit. <sup>b</sup> r<sub>H...O</sub> is the length of H bonds that are reported in Å.

## XYZ coordinates

### O1

0 1

|    |             |             |             |
|----|-------------|-------------|-------------|
| H  | -6.31183300 | 1.87497000  | -1.00525000 |
| Si | -5.48625700 | 0.81087300  | -0.44552500 |
| O  | -3.92731400 | 0.78404700  | -1.04286600 |
| O  | -6.08704000 | -0.72246600 | -0.73886100 |
| O  | -5.31687500 | 0.89795400  | 1.21455600  |
| Si | -5.22315900 | -2.01991300 | -0.13956700 |
| H  | -5.82689800 | -3.31252000 | -0.44707900 |
| Si | -2.88395400 | -0.38974900 | -0.47128400 |
| Si | -4.39331800 | -0.27455800 | 1.96464200  |
| H  | -4.30757600 | -0.11156500 | 3.41177800  |
| O  | -5.07372500 | -1.72950300 | 1.49877200  |
| O  | -3.68043500 | -1.84214700 | -0.75601900 |
| O  | -2.91238100 | -0.22479100 | 1.19550600  |
| C  | -1.18819700 | -0.33275000 | -1.20169400 |
| H  | -1.30269900 | -0.32120500 | -2.29197600 |
| H  | -0.75871300 | 0.63320900  | -0.91784900 |
| C  | -0.29363400 | -1.50874700 | -0.76221800 |
| H  | -0.14915100 | -1.49035500 | 0.32324600  |
| H  | -0.78763900 | -2.45858300 | -0.98815800 |
| C  | 1.07263800  | -1.55356700 | -1.44752500 |
| H  | 0.97012300  | -1.54506000 | -2.53576200 |
| H  | 1.61312300  | -2.45772300 | -1.15922900 |
| N  | 1.92782800  | -0.38753600 | -1.07364000 |
| H  | 1.53310100  | 0.53387600  | -1.39239700 |
| H  | 1.97902000  | -0.29772000 | -0.03751400 |
| C  | 3.33819600  | -0.41252300 | -1.61100300 |
| H  | 3.68315600  | 0.61996700  | -1.57670800 |
| H  | 3.27112000  | -0.70882300 | -2.65764700 |
| C  | 4.29363100  | -1.32701700 | -0.87620600 |
| C  | 6.22325900  | -3.00653400 | 0.31365800  |
| C  | 4.77308300  | -1.08378800 | 0.42740300  |
| C  | 4.81233100  | -2.43310400 | -1.55405200 |
| C  | 5.76403100  | -3.26915900 | -0.97100100 |
| C  | 5.72520200  | -1.90962500 | 1.01498000  |
| H  | 4.47598600  | -2.63349800 | -2.56579400 |
| H  | 6.14639000  | -4.11732800 | -1.52664200 |
| S  | 1.40516000  | 3.19103100  | -0.62681100 |
| O  | 0.22338700  | 2.48616000  | 0.31329800  |
| H  | 0.08879300  | 3.02262300  | 1.10790100  |
| O  | 2.61722400  | 3.21476200  | 0.25590500  |
| O  | 0.94466700  | 4.50728000  | -1.01887900 |
| O  | 1.50611900  | 2.17071600  | -1.70368300 |

|   |            |             |            |
|---|------------|-------------|------------|
| H | 6.06921400 | -1.68375100 | 2.01624900 |
| H | 6.96810100 | -3.64509100 | 0.77317400 |
| S | 4.11971100 | 0.24440100  | 1.46665400 |
| O | 4.40265900 | 1.51120600  | 0.57454300 |
| H | 3.61109800 | 2.20275800  | 0.48942800 |
| O | 2.65714700 | 0.03179000  | 1.54845000 |
| O | 4.87568300 | 0.27617000  | 2.70283800 |

1 2 1.0  
2 3 1.0 4 1.0 5 1.0  
3 8 1.0  
4 6 1.0  
5 9 1.0  
6 7 1.0 11 1.0 12 1.0  
7  
8 12 1.0 13 1.0 14 1.0  
9 10 1.0 11 1.0 13 1.0  
10  
11  
12  
13  
14 15 1.0 16 1.0 17 1.0  
15  
16  
17 18 1.0 19 1.0 20 1.0  
18  
19  
20 21 1.0 22 1.0 23 1.0  
21  
22  
23 24 1.0 25 1.0 26 1.0  
24  
25  
26 27 1.0 28 1.0 29 1.0  
27  
28  
29 31 1.5 32 1.5  
30 33 1.5 34 1.5 44 1.0  
31 34 1.5 45 1.0  
32 33 1.5 35 1.0  
33 36 1.0  
34 43 1.0  
35  
36  
37 38 1.0 40 1.5 41 1.5 42 1.5  
38 39 1.0

39  
40  
41  
42  
43  
44  
45 46 1.0 48 2.0 49 2.0  
46 47 1.0  
47  
48  
49

## O2

0 1

|    |             |             |             |
|----|-------------|-------------|-------------|
| H  | -4.52946400 | -2.92139300 | 0.38519900  |
| Si | -4.46464400 | -1.46603600 | 0.32109400  |
| O  | -3.01170300 | -0.91273300 | -0.33222100 |
| O  | -4.58877000 | -0.71393900 | 1.80217900  |
| O  | -5.65097800 | -0.77706800 | -0.62627300 |
| Si | -4.51211500 | 0.95340100  | 1.84469400  |
| H  | -4.64050100 | 1.51165800  | 3.18600900  |
| Si | -2.79382200 | 0.76494100  | -0.45339200 |
| Si | -5.65321100 | 0.88747400  | -0.77593700 |
| H  | -6.73070600 | 1.39364700  | -1.61906300 |
| O  | -5.70220400 | 1.46917000  | 0.79007400  |
| O  | -3.07221200 | 1.33716300  | 1.09268600  |
| O  | -4.12770000 | 1.26781800  | -1.33547200 |
| C  | -1.19180300 | 1.32958600  | -1.19494000 |
| H  | -0.75500300 | 0.45299000  | -1.68238900 |
| S  | 0.40321700  | -2.00814100 | -0.32246000 |
| O  | 1.44907000  | -2.98670100 | 0.04367900  |
| O  | 0.14735600  | -0.97300300 | 0.70395500  |
| O  | 0.64733000  | -1.36786900 | -1.66052700 |
| H  | -1.44464100 | 2.04008300  | -1.98976200 |
| C  | -0.20076400 | 1.96979400  | -0.19680300 |
| H  | -0.55443100 | 2.96633200  | 0.08172800  |
| H  | -0.15290000 | 1.38545600  | 0.72303700  |
| C  | 1.21635900  | 2.13756900  | -0.75254800 |
| H  | 1.80350500  | 2.80022000  | -0.11406200 |
| H  | 1.20135100  | 2.55637200  | -1.76200400 |
| N  | 1.95834600  | 0.83436300  | -0.83595700 |
| H  | 1.39426400  | 0.09614800  | -1.34409400 |
| H  | 2.04192900  | 0.42004800  | 0.10189000  |
| O  | -0.94583600 | -2.88479800 | -0.47566900 |
| H  | -1.69282300 | -2.24855500 | -0.50603400 |
| C  | 3.32819000  | 0.89059700  | -1.47562900 |
| H  | 3.25007600  | 1.57029600  | -2.32429400 |
| H  | 3.53227700  | -0.10904400 | -1.85591200 |
| C  | 4.41050700  | 1.35250900  | -0.52602500 |
| C  | 6.41160700  | 2.29275800  | 1.22101400  |
| C  | 5.11458200  | 0.47349600  | 0.31900300  |
| C  | 4.75197200  | 2.70695400  | -0.47743300 |
| C  | 5.73966300  | 3.17837600  | 0.38633600  |
| C  | 6.10088200  | 0.93456400  | 1.18428700  |
| H  | 4.24549400  | 3.40305300  | -1.13779200 |
| H  | 5.98474800  | 4.23395600  | 0.39844900  |
| H  | 6.61768100  | 0.22494700  | 1.81777600  |
| H  | 7.18145900  | 2.64989100  | 1.89453000  |

|   |            |             |             |
|---|------------|-------------|-------------|
| S | 4.84894300 | -1.31867100 | 0.28296700  |
| O | 3.31036600 | -1.30568600 | 0.75819200  |
| H | 2.76035500 | -2.12325000 | 0.50706900  |
| O | 4.92676200 | -1.78624200 | -1.09711800 |
| O | 5.69230100 | -1.92468200 | 1.29768300  |



### O3

0 1

|    |             |             |             |
|----|-------------|-------------|-------------|
| H  | 6.60721600  | -1.36530600 | 2.43055200  |
| Si | 5.72594600  | -1.02145800 | 1.31966200  |
| O  | 4.13367200  | -0.80008600 | 1.77571500  |
| O  | 5.67583900  | -2.19019100 | 0.12507100  |
| O  | 6.16021200  | 0.38639900  | 0.53385100  |
| Si | 4.69934600  | -1.89815600 | -1.19980800 |
| H  | 4.72537700  | -2.97306500 | -2.18648400 |
| Si | 3.02745200  | -0.39821200 | 0.58341900  |
| Si | 5.21852300  | 0.87783600  | -0.75794700 |
| H  | 5.67993700  | 2.11496800  | -1.37674100 |
| O  | 5.20735100  | -0.42717200 | -1.80425700 |
| O  | 3.18052400  | -1.61308700 | -0.56493200 |
| O  | 3.66575700  | 0.95953800  | -0.15441900 |
| C  | 1.29698500  | -0.18669000 | 1.19663000  |
| H  | 1.03705100  | -1.09280700 | 1.75665800  |
| H  | 1.29697200  | 0.63825200  | 1.91749200  |
| C  | 0.27327300  | 0.07936600  | 0.07660900  |
| H  | 0.52435300  | 1.00483100  | -0.44925100 |
| H  | 0.30784300  | -0.73194900 | -0.65901200 |
| C  | -1.14154800 | 0.19771700  | 0.64164000  |
| H  | -1.21396100 | 1.01973900  | 1.35509200  |
| H  | -1.45311600 | -0.73205600 | 1.12180000  |
| N  | -2.11129300 | 0.50920500  | -0.45780700 |
| H  | -1.79727200 | 1.44246500  | -0.90027100 |
| H  | -2.09071600 | -0.23507700 | -1.16210900 |
| C  | -3.54243800 | 0.72804800  | -0.04004800 |
| H  | -4.10908800 | 0.86963000  | -0.96177500 |
| H  | -3.54504300 | 1.67064700  | 0.50575400  |
| C  | -4.13240900 | -0.36616100 | 0.82430300  |
| C  | -5.26244400 | -2.29395800 | 2.54949100  |
| C  | -4.60451200 | -1.60238700 | 0.34250900  |
| C  | -4.25774400 | -0.12974100 | 2.19621800  |
| C  | -4.81368800 | -1.07792300 | 3.05258900  |
| C  | -5.16468700 | -2.55895400 | 1.18562300  |
| H  | -3.91637000 | 0.82083900  | 2.59072300  |
| H  | -4.89604300 | -0.86152200 | 4.11114200  |
| S  | -1.56119300 | 3.91193100  | -0.15719100 |
| O  | -2.91095900 | 4.76316200  | -0.62453900 |
| H  | -2.63717600 | 5.40004100  | -1.29925400 |
| O  | -0.47284600 | 4.87683400  | -0.06423900 |
| O  | -1.36634500 | 2.89385000  | -1.25592000 |
| O  | -2.01976800 | 3.25947700  | 1.08415200  |
| H  | -5.50956000 | -3.50089600 | 0.78384800  |
| H  | -5.69408600 | -3.03738800 | 3.20870700  |

|   |             |             |             |
|---|-------------|-------------|-------------|
| S | -4.52966000 | -1.91418700 | -1.42794300 |
| O | -5.59941100 | -1.22224100 | -2.13243000 |
| O | -3.14777100 | -1.73517500 | -1.86196400 |
| O | -4.85439100 | -3.51571200 | -1.49439300 |
| H | -5.60099800 | -3.64047300 | -2.10160400 |

# M1

0 1

|    |             |             |             |
|----|-------------|-------------|-------------|
| H  | -5.78009800 | 0.18332700  | 3.22333800  |
| Si | -5.11332700 | -0.01832800 | 1.94230600  |
| O  | -3.89120600 | 1.09165400  | 1.64953100  |
| O  | -6.13179200 | 0.11303500  | 0.62480800  |
| O  | -4.38776700 | -1.51282100 | 1.78814500  |
| Si | -5.47541500 | -0.10766800 | -0.89584600 |
| H  | -6.44354300 | 0.02159200  | -1.97827400 |
| Si | -3.05903100 | 0.96118500  | 0.20998700  |
| Si | -3.59622000 | -1.87253500 | 0.36087100  |
| H  | -2.99380000 | -3.19770900 | 0.33237500  |
| O  | -4.71976000 | -1.59316100 | -0.83840700 |
| O  | -4.22346800 | 1.00217400  | -0.98393300 |
| O  | -2.47602300 | -0.62069500 | 0.20156000  |
| C  | -1.68701000 | 2.18453800  | -0.02203200 |
| H  | -2.05014000 | 3.18319100  | 0.24157000  |
| H  | -0.94037800 | 1.91405200  | 0.73395400  |
| C  | -1.09447500 | 2.17341400  | -1.44911800 |
| H  | -0.96717700 | 1.15291500  | -1.81928700 |
| H  | -1.79741400 | 2.65689400  | -2.13213300 |
| C  | 0.24438300  | 2.90203200  | -1.57945500 |
| H  | 0.19815900  | 3.91040500  | -1.15874800 |
| H  | 0.53387500  | 2.97802700  | -2.62920700 |
| N  | 1.34837800  | 2.16039300  | -0.89035100 |
| H  | 1.10290200  | 1.98398900  | 0.08580900  |
| H  | 1.42902900  | 1.17057200  | -1.33075500 |
| C  | 2.69893200  | 2.82892000  | -0.94718700 |
| H  | 2.56334700  | 3.88225000  | -0.69511500 |
| H  | 3.03169000  | 2.75934500  | -1.98435500 |
| C  | 3.66338000  | 2.16303800  | 0.00219000  |
| C  | 5.35610500  | 0.87629600  | 1.82944800  |
| C  | 4.14268700  | 0.87968600  | -0.27463800 |
| C  | 4.05359600  | 2.80395200  | 1.18271100  |
| C  | 4.90451300  | 2.16862500  | 2.08541100  |
| C  | 4.96323200  | 0.24706400  | 0.65130600  |
| H  | 3.69843800  | 3.80733900  | 1.39589200  |
| H  | 5.21119400  | 2.67817500  | 2.99117100  |
| S  | 0.98548200  | -1.36756900 | -1.20610600 |
| O  | 0.31702000  | -0.58757400 | 0.11665900  |
| H  | -0.63495900 | -0.81542400 | 0.15091800  |
| O  | 1.55147300  | -0.19466600 | -1.96460400 |
| O  | -0.12287800 | -2.03878400 | -1.87262400 |
| O  | 2.04075100  | -2.23022500 | -0.65794300 |
| H  | 6.00927100  | 0.35868400  | 2.52077900  |
| S  | 5.49390000  | -1.44665900 | 0.31812000  |

|   |            |             |             |
|---|------------|-------------|-------------|
| O | 6.58412600 | -1.75626100 | 1.22492600  |
| O | 4.23883400 | -2.30239200 | 0.83019700  |
| H | 3.45819100 | -2.25743200 | 0.20922100  |
| O | 5.63844700 | -1.57968700 | -1.12364200 |
| H | 3.86445300 | 0.36738100  | -1.18858700 |

## M2

0 1

|    |             |             |             |
|----|-------------|-------------|-------------|
| H  | -7.91708800 | 1.29479800  | -0.73115400 |
| Si | -6.67271900 | 0.62717400  | -0.36516200 |
| O  | -5.30621700 | 1.52481400  | -0.72038200 |
| O  | -6.44473500 | -0.83464800 | -1.13966900 |
| O  | -6.55293900 | 0.28335900  | 1.26509600  |
| Si | -5.05133900 | -1.69173600 | -0.79294100 |
| H  | -4.94829500 | -2.95358100 | -1.51666900 |
| Si | -3.81972500 | 0.85430200  | -0.34277200 |
| Si | -5.16860300 | -0.48729300 | 1.79901800  |
| H  | -5.16241300 | -0.74520600 | 3.23435600  |
| O  | -5.05223300 | -1.86799400 | 0.86770700  |
| O  | -3.80387800 | -0.62741500 | -1.11778200 |
| O  | -3.91248200 | 0.49032500  | 1.28764000  |
| C  | -2.38591700 | 1.94220000  | -0.77414600 |
| H  | -2.43526300 | 2.13583700  | -1.85187300 |
| H  | -2.55188700 | 2.90529200  | -0.27707700 |
| C  | -1.01688700 | 1.35294200  | -0.38711600 |
| H  | -0.98480100 | 1.14315400  | 0.68610500  |
| H  | -0.85602200 | 0.39821200  | -0.89435400 |
| C  | 0.11280700  | 2.31556700  | -0.75274500 |
| H  | -0.00005200 | 3.27288900  | -0.23687800 |
| H  | 0.13131600  | 2.50918000  | -1.82801000 |
| N  | 1.45267700  | 1.75668900  | -0.38802100 |
| H  | 1.47835800  | 1.49618900  | 0.60806500  |
| H  | 1.57096000  | 0.80209000  | -0.84410800 |
| C  | 2.62015400  | 2.64548100  | -0.73275700 |
| H  | 2.37851000  | 3.65224200  | -0.38826000 |
| H  | 2.68389200  | 2.66124900  | -1.82275800 |
| C  | 3.90002400  | 2.15674000  | -0.10120000 |
| C  | 6.23680100  | 1.22015700  | 1.13547200  |
| C  | 4.50127200  | 0.97595700  | -0.54710400 |
| C  | 4.48283200  | 2.86830600  | 0.95103900  |
| C  | 5.65088000  | 2.40913500  | 1.55817100  |
| C  | 5.64660200  | 0.51458800  | 0.08942400  |
| H  | 4.02692000  | 3.79048200  | 1.29717200  |
| H  | 6.09972500  | 2.97536200  | 2.36551600  |
| S  | 1.81827400  | -1.47322200 | 0.23690400  |
| O  | 0.52793600  | -2.48406300 | 0.31918300  |
| H  | 0.75529400  | -3.30215300 | -0.14635100 |
| O  | 2.99721300  | -2.35104000 | 0.35052500  |
| O  | 1.58487300  | -0.52150900 | 1.33489200  |
| O  | 1.72386200  | -0.79892000 | -1.10095600 |
| H  | 7.14016400  | 0.84204600  | 1.59759800  |
| S  | 6.34731800  | -1.06684400 | -0.42458400 |

|   |            |             |             |
|---|------------|-------------|-------------|
| O | 7.75621900 | -1.07286000 | -0.07776500 |
| O | 5.64833500 | -2.09461000 | 0.59205300  |
| H | 4.67032000 | -2.18828900 | 0.42858200  |
| O | 5.89673700 | -1.31937700 | -1.78566500 |
| H | 4.08263300 | 0.40524800  | -1.36811700 |

### M3

0 1

|    |             |             |             |
|----|-------------|-------------|-------------|
| H  | 6.33289100  | 2.75651500  | 1.61266200  |
| Si | 5.89579900  | 1.49588100  | 1.02237900  |
| O  | 4.50291700  | 1.63817600  | 0.10657500  |
| O  | 5.55504400  | 0.31265900  | 2.14957900  |
| O  | 7.02162900  | 0.81395400  | -0.00575600 |
| Si | 5.04504600  | -1.17660600 | 1.58467000  |
| H  | 4.77723300  | -2.14174300 | 2.64416900  |
| Si | 3.90916300  | 0.25108300  | -0.62625700 |
| Si | 6.62897100  | -0.63626000 | -0.73885100 |
| H  | 7.67701300  | -1.15204600 | -1.61214700 |
| O  | 6.23365000  | -1.66445200 | 0.51619400  |
| O  | 3.71835700  | -0.83855500 | 0.62692400  |
| O  | 5.18524100  | -0.33900900 | -1.53017500 |
| C  | 2.36189000  | 0.54456600  | -1.59743000 |
| H  | 2.57891200  | 1.33391400  | -2.32652600 |
| H  | 2.14992300  | -0.36357000 | -2.17186400 |
| C  | 1.15013900  | 0.91904500  | -0.72312600 |
| H  | 0.91167200  | 0.09559000  | -0.04459600 |
| H  | 1.39274400  | 1.79101800  | -0.10390300 |
| C  | -0.07560200 | 1.22830800  | -1.58004200 |
| H  | -0.34617600 | 0.37866900  | -2.20896700 |
| H  | 0.08634600  | 2.10449600  | -2.21334500 |
| N  | -1.27787200 | 1.49143300  | -0.71993700 |
| H  | -1.48965600 | 0.58404300  | -0.18847000 |
| H  | -1.05349900 | 2.19017300  | -0.00945400 |
| C  | -2.50301900 | 1.93949900  | -1.48887400 |
| H  | -2.63567200 | 1.20593800  | -2.28254200 |
| H  | -2.26954900 | 2.91263900  | -1.92617500 |
| C  | -3.71041200 | 1.99003700  | -0.58928200 |
| C  | -5.86789000 | 1.96496000  | 1.20324100  |
| C  | -4.57358000 | 0.89488400  | -0.54886900 |
| C  | -3.95563300 | 3.08838800  | 0.24352700  |
| C  | -5.03183000 | 3.07842800  | 1.12795400  |
| C  | -5.62644600 | 0.88683700  | 0.35859300  |
| H  | -3.31216200 | 3.96250900  | 0.19624600  |
| H  | -5.21928300 | 3.93625200  | 1.76286200  |
| S  | -2.25405300 | -1.83737300 | -0.40107100 |
| O  | -1.15501100 | -3.05820800 | -0.36243400 |
| H  | -1.59183600 | -3.86328800 | -0.67659000 |
| O  | -3.50717500 | -2.42946800 | 0.10412400  |
| O  | -2.31665100 | -1.33843900 | -1.78782400 |
| O  | -1.62962500 | -0.83335500 | 0.51205500  |
| H  | -6.70176900 | 1.92989300  | 1.89315800  |
| S  | -6.65939300 | -0.58996000 | 0.45648700  |

|   |             |             |             |
|---|-------------|-------------|-------------|
| O | -6.80452900 | -1.10956200 | -0.89498800 |
| O | -5.74931800 | -1.58515500 | 1.33079200  |
| H | -4.95748500 | -1.91678100 | 0.82746900  |
| O | -7.81199600 | -0.27931100 | 1.28138700  |
| H | -4.42106800 | 0.05180500  | -1.21207800 |



**P1**

0 1

|    |             |             |             |
|----|-------------|-------------|-------------|
| H  | -5.12603600 | 0.81312500  | 3.38581400  |
| Si | -5.11602700 | 0.31631900  | 2.01524900  |
| O  | -4.01446200 | 1.08897900  | 1.02429700  |
| O  | -6.58343900 | 0.47366500  | 1.23143500  |
| O  | -4.73170400 | -1.30708400 | 1.89392700  |
| Si | -6.69274900 | -0.06416100 | -0.34501600 |
| H  | -8.01336800 | 0.11357400  | -0.93715400 |
| Si | -3.91710300 | 0.61340500  | -0.57558000 |
| Si | -4.69753600 | -1.98447900 | 0.37051500  |
| H  | -4.35042500 | -3.40183600 | 0.36688700  |
| O  | -6.19117100 | -1.65895700 | -0.29682000 |
| O  | -5.47618900 | 0.73780400  | -1.16513600 |
| O  | -3.61600900 | -1.04177400 | -0.49834700 |
| C  | -2.66878000 | 1.55967000  | -1.56226800 |
| H  | -2.85410300 | 1.37015600  | -2.62568300 |
| H  | -2.90034900 | 2.61845900  | -1.40515300 |
| C  | -1.18621200 | 1.31167200  | -1.21025900 |
| H  | -0.56979500 | 2.08103700  | -1.68334800 |
| H  | -1.02633700 | 1.41520800  | -0.13292600 |
| C  | -0.70413400 | -0.06571900 | -1.67076100 |
| H  | -0.78464500 | -0.16639600 | -2.75632300 |
| H  | -1.28153800 | -0.86963000 | -1.21113800 |
| N  | 0.73296800  | -0.26929500 | -1.31077600 |
| H  | 1.32206800  | 0.51611400  | -1.67605700 |
| H  | 0.88209700  | -0.12015200 | -0.29175100 |
| C  | 1.32756800  | -1.59589600 | -1.72590200 |
| H  | 1.26104000  | -1.64972300 | -2.81391200 |
| H  | 0.70121300  | -2.37928600 | -1.29646200 |
| C  | 2.74764400  | -1.66192700 | -1.23092000 |
| C  | 5.22618900  | -1.24857400 | -0.08022600 |
| C  | 3.02038100  | -2.16867700 | 0.04412100  |
| C  | 3.76396500  | -1.04541300 | -1.96371100 |
| C  | 5.00975500  | -0.82619500 | -1.38672400 |
| C  | 4.26497300  | -1.96629400 | 0.62707800  |
| H  | 3.56659600  | -0.66710600 | -2.96086900 |
| H  | 5.78523800  | -0.28513400 | -1.91303000 |
| S  | 2.67220300  | 1.97401900  | 0.14083500  |
| O  | 2.08508900  | 3.43089300  | 0.63564900  |
| H  | 2.75416200  | 4.10392300  | 0.44440700  |
| O  | 2.41374300  | 1.90408800  | -1.32707800 |
| O  | 1.83374000  | 1.01183500  | 0.88897200  |
| O  | 4.10526500  | 1.99757400  | 0.48602000  |
| H  | 2.24249500  | -2.67209200 | 0.60868000  |
| H  | 4.47248300  | -2.30812500 | 1.63334700  |

|   |            |             |             |
|---|------------|-------------|-------------|
| S | 6.68765800 | -0.65590000 | 0.78689000  |
| O | 6.02440700 | 0.47803400  | 1.72642800  |
| H | 5.40490800 | 1.07191000  | 1.23166000  |
| O | 7.57209400 | -0.04930000 | -0.19711400 |
| O | 7.17182200 | -1.67575000 | 1.69901100  |

## P2

0 1

|    |             |             |             |
|----|-------------|-------------|-------------|
| H  | 5.46854400  | -2.46772900 | 2.41991500  |
| Si | 5.22781900  | -1.50836700 | 1.34802700  |
| O  | 3.77102100  | -0.70143000 | 1.48681900  |
| O  | 5.20165700  | -2.19709500 | -0.17347600 |
| O  | 6.38268200  | -0.30259100 | 1.25926700  |
| Si | 4.93733300  | -1.19179300 | -1.48110400 |
| H  | 4.93500700  | -1.88736900 | -2.76297400 |
| Si | 3.38301700  | 0.41960300  | 0.30952000  |
| Si | 6.20967400  | 0.84987800  | 0.06247700  |
| H  | 7.26593300  | 1.85672900  | 0.06651700  |
| O  | 6.11578100  | -0.01019400 | -1.36636200 |
| O  | 3.50491100  | -0.40287800 | -1.14163400 |
| O  | 4.68098200  | 1.48637000  | 0.28953900  |
| C  | 1.76557300  | 1.27639900  | 0.57186400  |
| H  | 1.01870900  | 0.51621300  | 0.82240800  |
| H  | 1.89214600  | 1.90683500  | 1.46102100  |
| C  | 1.32145400  | 2.12667800  | -0.63532400 |
| H  | 2.13382800  | 2.78997600  | -0.94878300 |
| H  | 1.10492200  | 1.48040300  | -1.49111200 |
| C  | 0.12134300  | 3.03445300  | -0.36200300 |
| H  | -0.05359500 | 3.70309600  | -1.20788100 |
| H  | 0.28794800  | 3.64828400  | 0.52687000  |
| N  | -1.15321500 | 2.27784600  | -0.14360200 |
| H  | -1.36965900 | 1.66002600  | -0.95710500 |
| H  | -1.04847200 | 1.54623000  | 0.59160100  |
| C  | -2.34990700 | 3.15006900  | 0.17441800  |
| H  | -2.41779400 | 3.89848000  | -0.61666000 |
| H  | -2.13138200 | 3.65564700  | 1.11665000  |
| C  | -3.58661000 | 2.29730300  | 0.25298300  |
| C  | -5.52171300 | 0.32542300  | 0.24757900  |
| C  | -4.35936600 | 2.07872600  | -0.89263800 |
| C  | -3.86908300 | 1.59328100  | 1.42527100  |
| C  | -4.83359100 | 0.59184400  | 1.42542800  |
| C  | -5.33609000 | 1.09140900  | -0.90046200 |
| H  | -3.28886800 | 1.77186100  | 2.32405000  |
| H  | -5.01418000 | -0.01441600 | 2.30340600  |
| S  | -1.67519100 | -0.99340700 | -0.29433100 |
| O  | -0.48045800 | -2.04924700 | -0.70041200 |
| H  | -0.57061900 | -2.83547800 | -0.14243800 |
| O  | -2.87122300 | -1.82401300 | -0.07132500 |
| O  | -1.71598900 | -0.08457500 | -1.46273300 |
| O  | -1.20096400 | -0.28611200 | 0.93048600  |
| H  | -4.16247700 | 2.64159100  | -1.79903200 |
| H  | -5.90778700 | 0.87841600  | -1.79502500 |

|   |             |             |             |
|---|-------------|-------------|-------------|
| S | -6.50105200 | -1.18081000 | 0.14139800  |
| O | -5.51414600 | -2.09892900 | -0.74973100 |
| H | -4.57566500 | -2.05968200 | -0.43681200 |
| O | -7.67119900 | -0.95665200 | -0.68732500 |
| O | -6.62755500 | -1.72397600 | 1.48562800  |

**P3**

0 1

|    |             |             |             |
|----|-------------|-------------|-------------|
| H  | -4.96066300 | -2.56175000 | -2.09684500 |
| Si | -5.05534100 | -1.50156300 | -1.09996900 |
| O  | -3.57470500 | -0.91809500 | -0.59418600 |
| O  | -5.83982500 | -1.96731100 | 0.30051100  |
| O  | -5.88834400 | -0.15382500 | -1.63621900 |
| Si | -6.00907600 | -0.83279100 | 1.51408200  |
| H  | -6.70848800 | -1.33471100 | 2.69148900  |
| Si | -3.55650700 | 0.29531200  | 0.55651300  |
| Si | -6.06042500 | 1.12200900  | -0.57275100 |
| H  | -6.80027700 | 2.24887200  | -1.13159400 |
| O  | -6.77057200 | 0.46817600  | 0.79035600  |
| O  | -4.45758700 | -0.29973600 | 1.83323900  |
| O  | -4.50332200 | 1.51369900  | -0.10710700 |
| C  | -1.87141100 | 0.88326000  | 1.03617800  |
| H  | -2.01729400 | 1.66925200  | 1.78725700  |
| H  | -1.34367100 | 0.06190500  | 1.53142700  |
| C  | -1.02811600 | 1.39878700  | -0.14427700 |
| H  | -0.78792600 | 0.56278900  | -0.80565400 |
| H  | -1.59537400 | 2.13254900  | -0.72989800 |
| C  | 0.26662200  | 2.03537500  | 0.35598000  |
| H  | 0.79997400  | 1.34172900  | 1.00488800  |
| H  | 0.07230900  | 2.97223800  | 0.88393100  |
| N  | 1.19004900  | 2.34174400  | -0.79592500 |
| H  | 1.53120100  | 1.39244500  | -1.17257800 |
| H  | 0.64742100  | 2.78520600  | -1.53796900 |
| C  | 2.39032500  | 3.22171200  | -0.45891800 |
| H  | 2.08501600  | 3.88283300  | 0.35353800  |
| H  | 2.59083000  | 3.82908500  | -1.34195800 |
| C  | 3.58623200  | 2.37940900  | -0.10831000 |
| C  | 5.53449200  | 0.47305200  | 0.36196500  |
| C  | 3.69805400  | 1.79065200  | 1.15324500  |
| C  | 4.52480500  | 2.07515200  | -1.10002100 |
| C  | 5.51034600  | 1.12581100  | -0.86792300 |
| C  | 4.66499500  | 0.81849800  | 1.38967100  |
| H  | 4.45656800  | 2.54494900  | -2.07529200 |
| H  | 6.21676500  | 0.85582800  | -1.64291800 |
| S  | 1.94268700  | -1.23027300 | -0.64440400 |
| O  | 0.91862500  | -2.23201100 | -1.46043500 |
| H  | 0.96533100  | -3.10705900 | -1.04874000 |
| O  | 1.30166400  | -0.90666300 | 0.64001700  |
| O  | 1.98893700  | -0.06010100 | -1.57457500 |
| O  | 3.20960200  | -1.97532200 | -0.53720700 |
| H  | 3.00012900  | 2.04623200  | 1.94266700  |
| H  | 4.72122500  | 0.29958000  | 2.33775600  |

|   |            |             |             |
|---|------------|-------------|-------------|
| S | 6.59567900 | -0.96799600 | 0.56499400  |
| O | 5.91514000 | -1.98045600 | -0.48793400 |
| H | 4.92697000 | -2.01072900 | -0.40485700 |
| O | 6.42517600 | -1.44948300 | 1.92798200  |
| O | 7.91728200 | -0.68923800 | 0.03325800  |

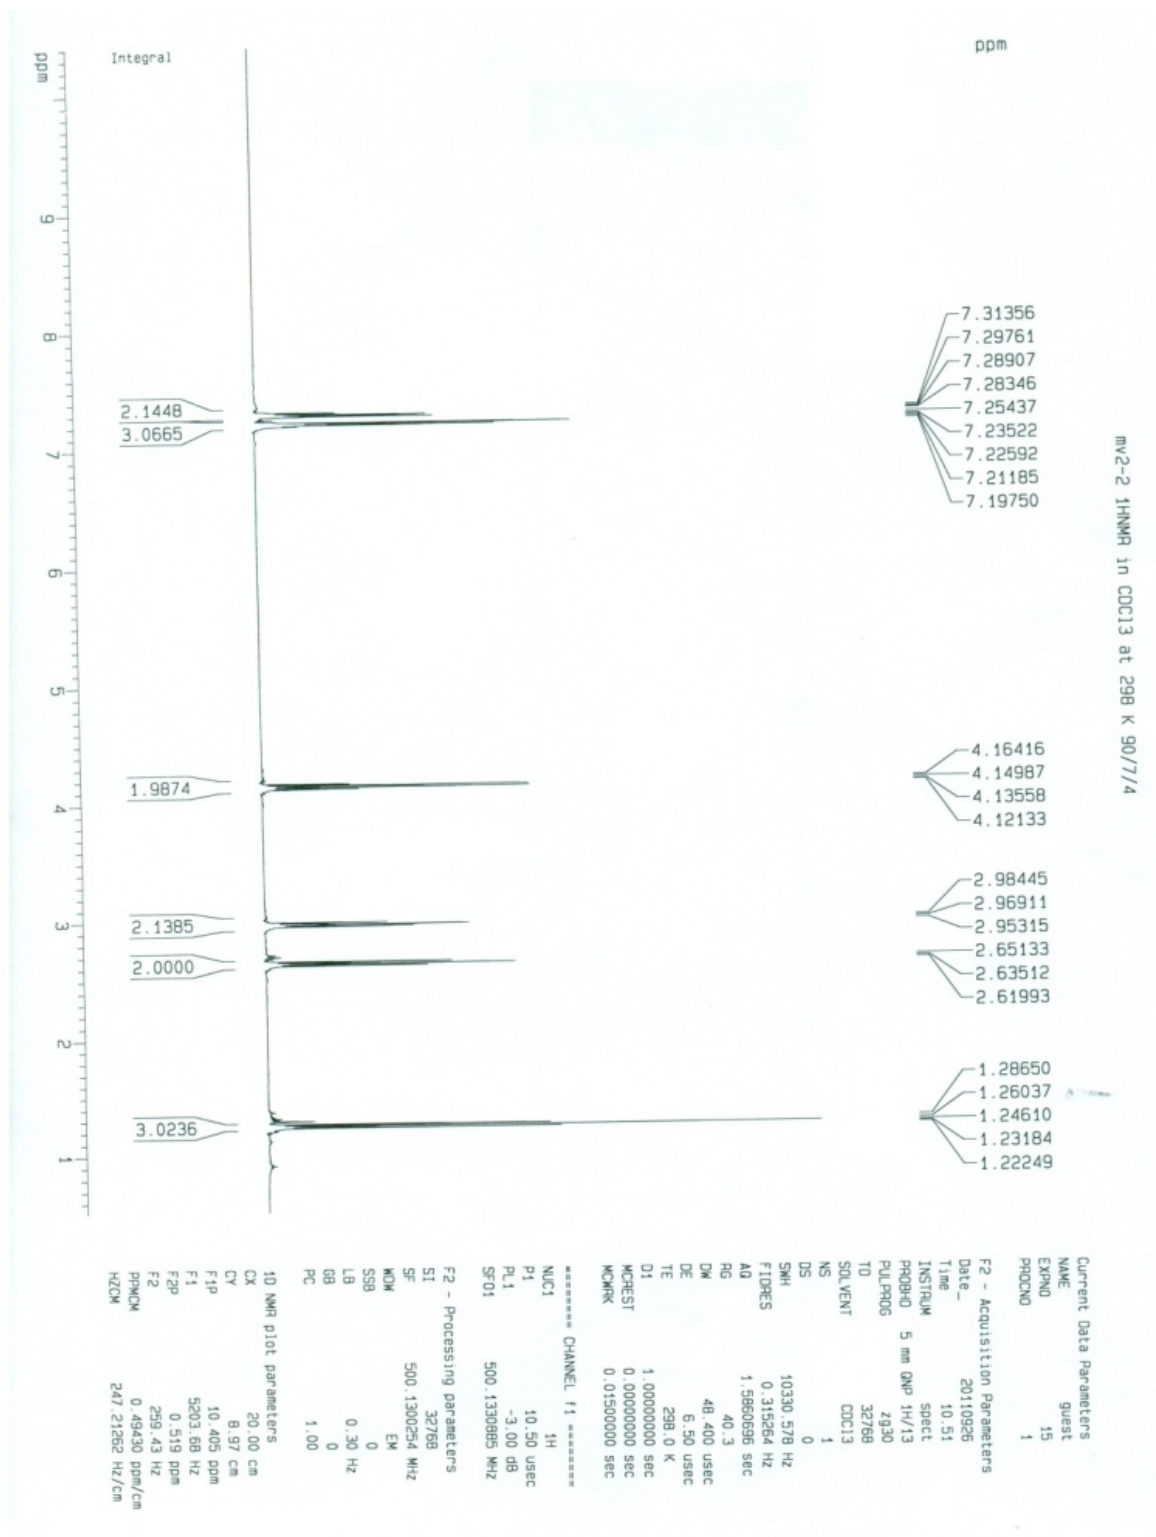

Fig 2S: <sup>1</sup>H NMR of the ethyl-(3-phenylpropionate)

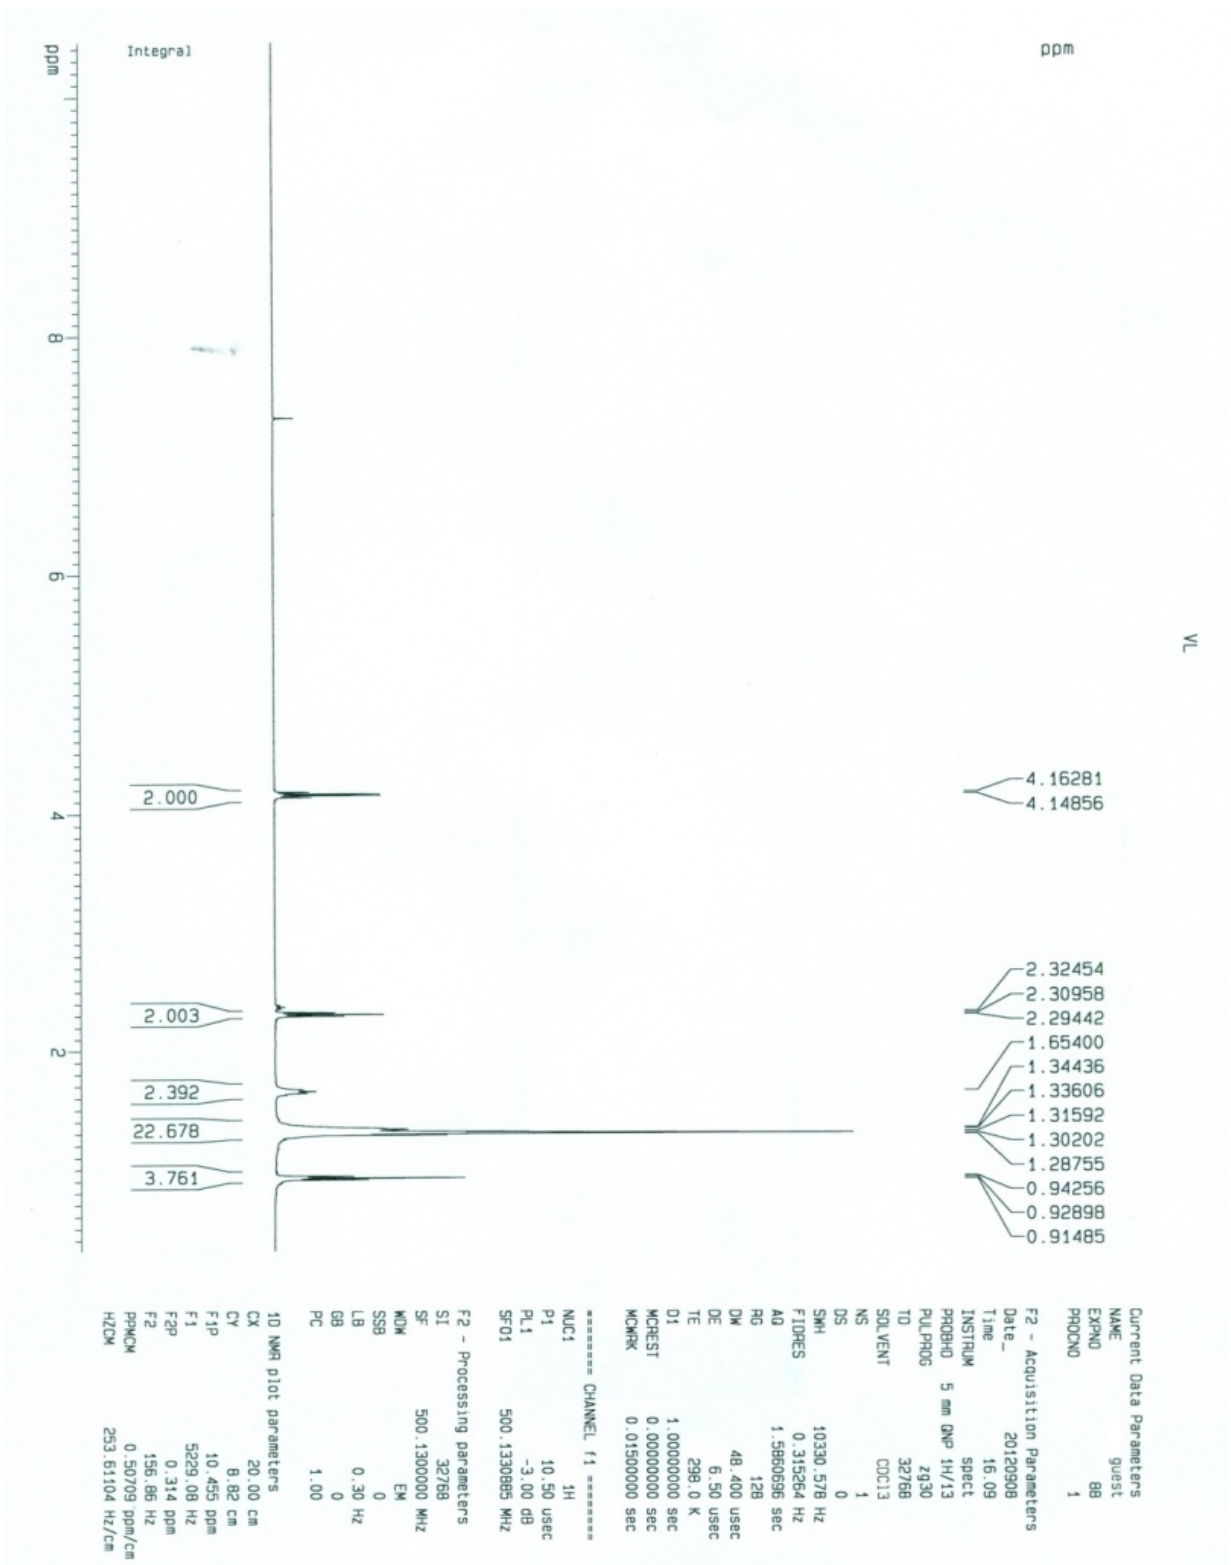

Fig 3S <sup>1</sup>H NMR of the ethyl laurate



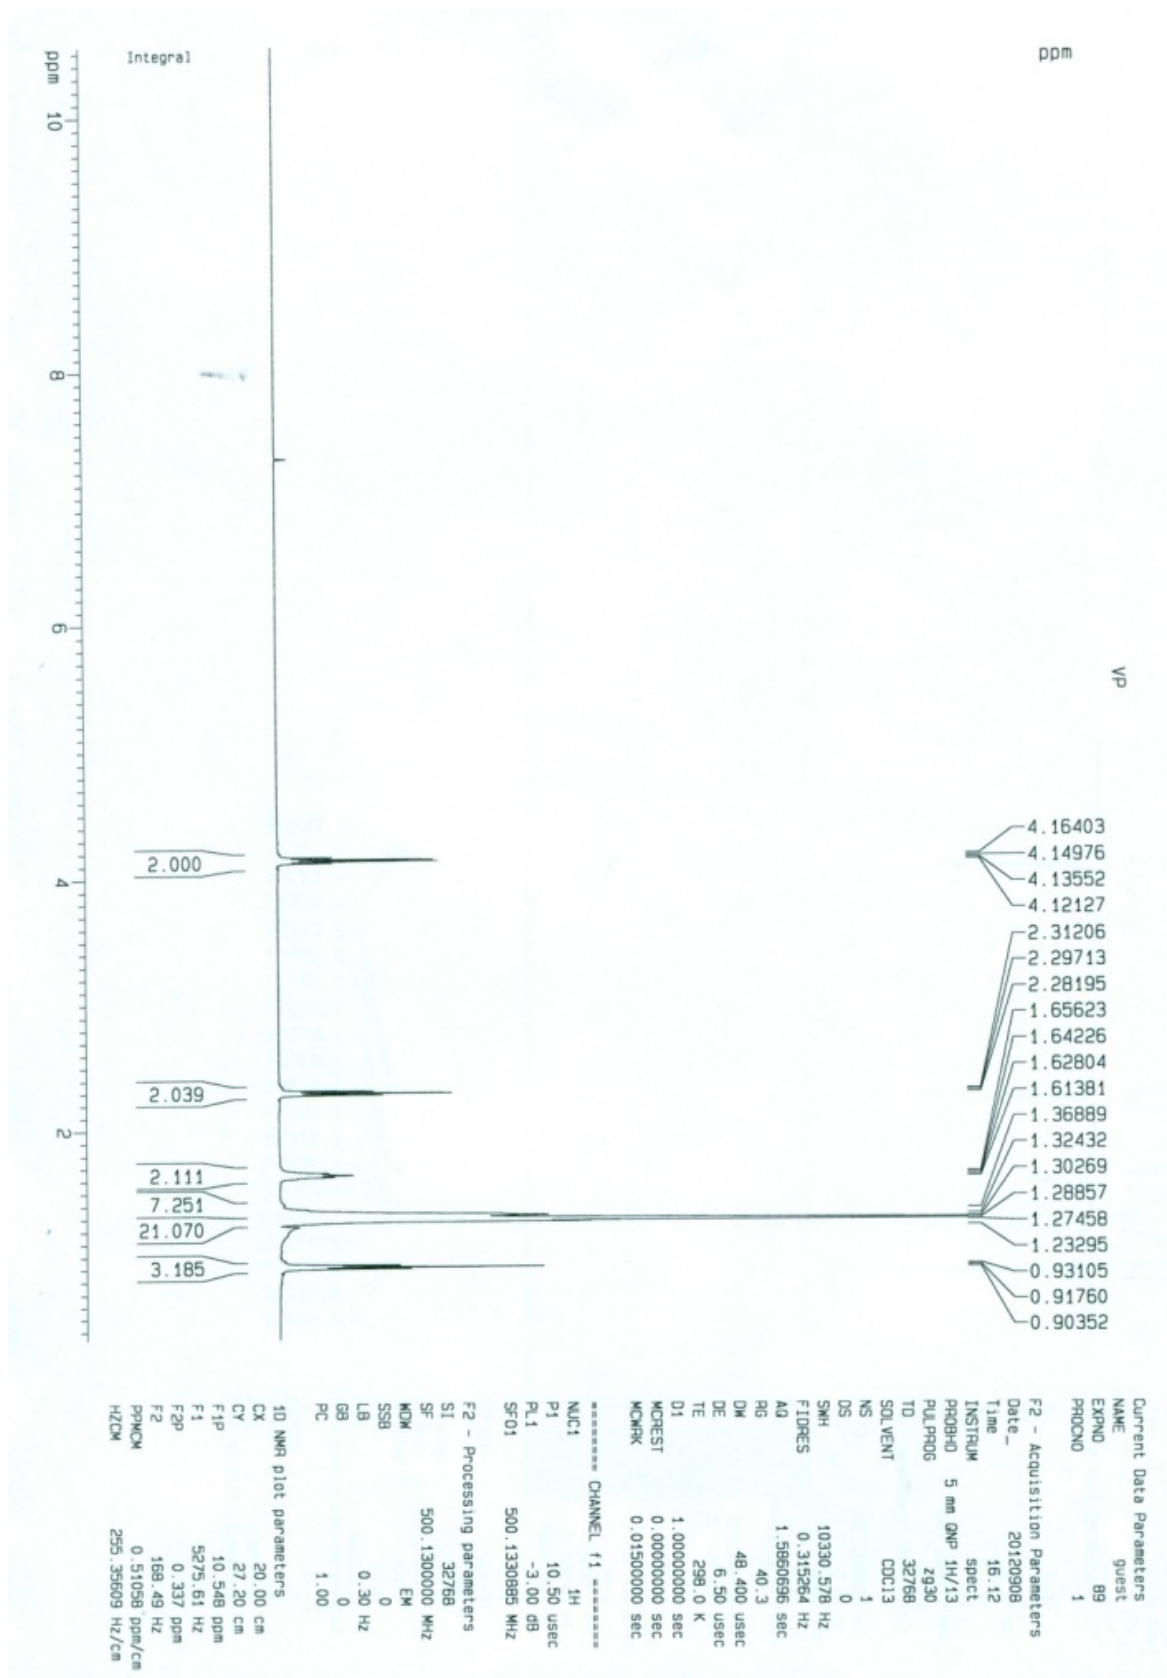

Fig 4S: <sup>1</sup>H NMR of the ethyl palmitate

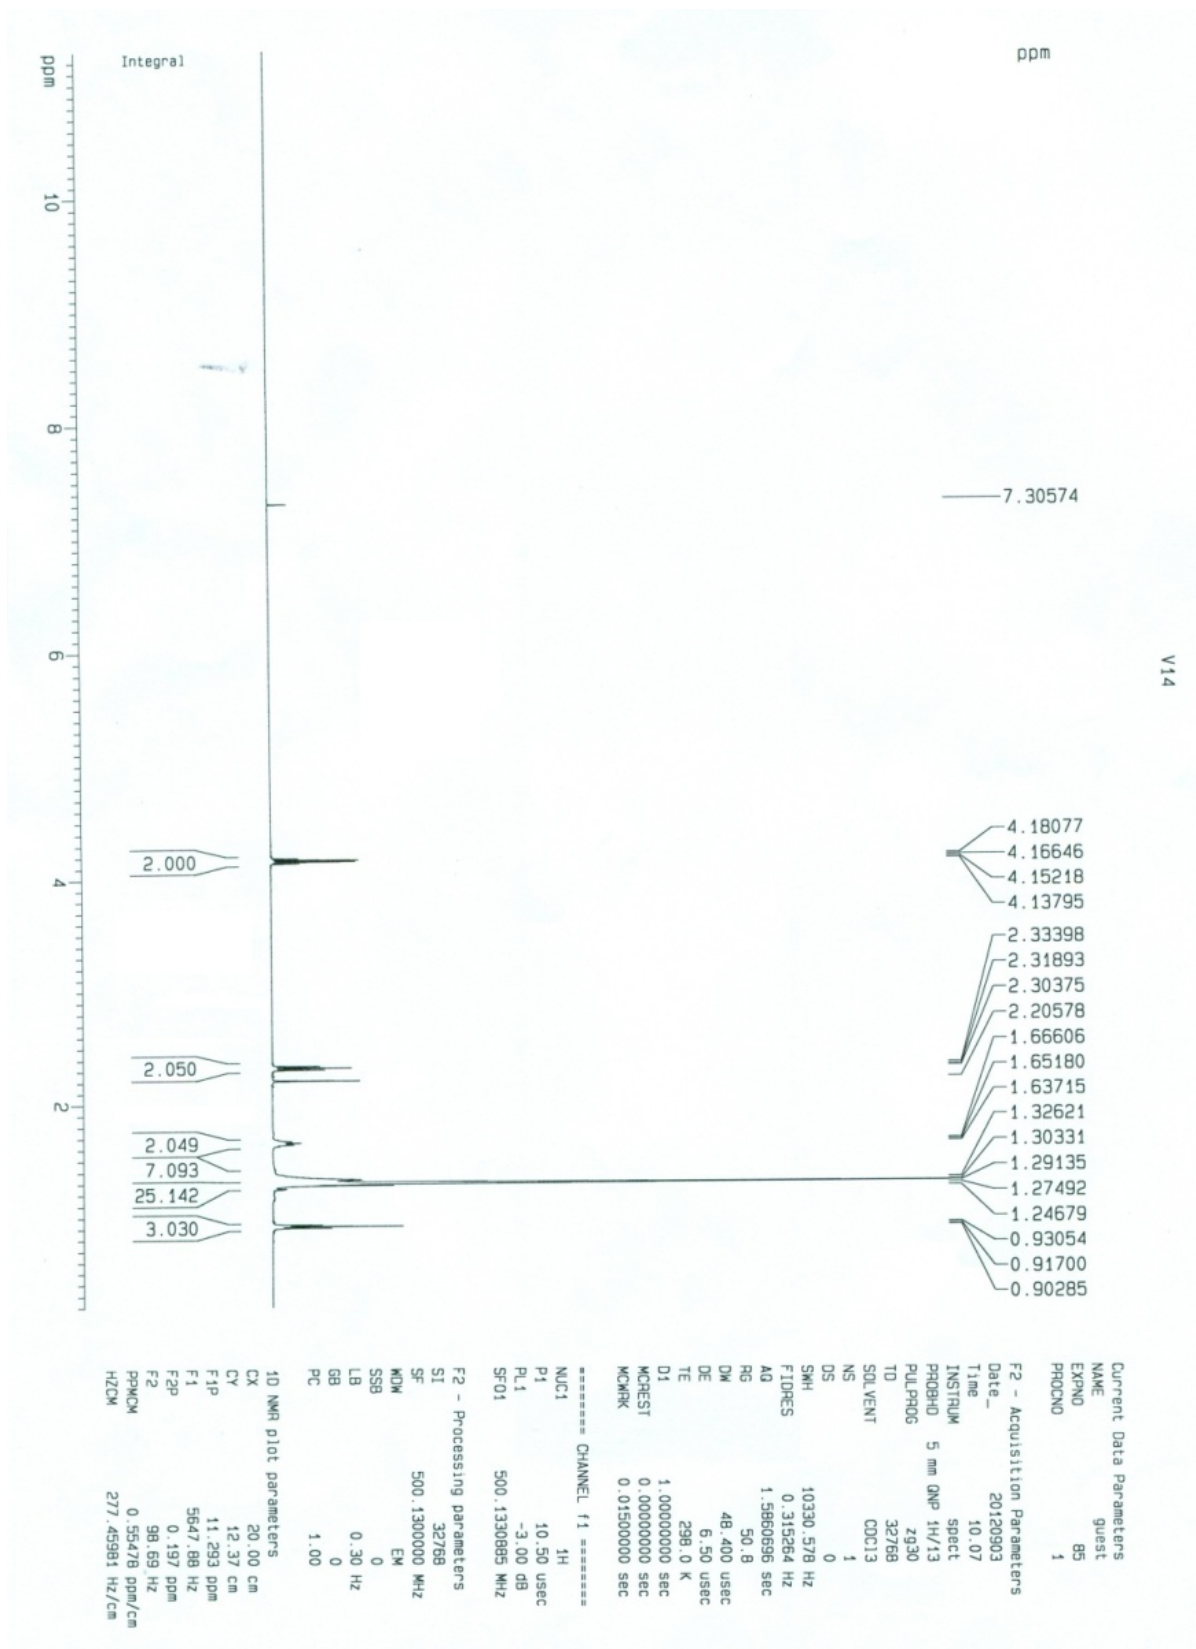

Fig 5S: <sup>1</sup>H NMR of the ethyl stearate
